# Supplementary material
Source: MDPI journal article supplement (https://www.mdpi.com/2071-1050/15/1/501)
Supplement: s1 [file s1]

Archive with 5 entries (5 files):
- Table S1.xlsx
- Table S2.pdf
- Table S3.pdf
- Table S4.xlsx
- Table S5.xlsx
