# Supplementary material
Source: MDPI journal article supplement (https://www.mdpi.com/2071-1050/15/1/501)
Supplement: s1 [file s1 › Table S1.xlsx]

## Sheet: Φύλλο1
Table S1. Sequences of primers for NGS libraries
16S_F	5’‐TCGTCGGCAGCGTCAGATGTGTATAAGAGACAGCCTACGGGNGGCWGCAG‐3’
16S_R	5’ TCTCGTGGGCTCGGAGATGTGTATAAGAGACAGGACTACHVGGGTATCTAATCC‐3’
