# Supplementary material
Source: MDPI journal article supplement (https://www.mdpi.com/2071-1050/15/1/501)
Supplement: s1 [file s1 › Table S2.pdf]

**Table S2.** Pairwise ANOSIM analysis of the chicken fecal microbiota comparing samples from different age groups.

| Comparison  | R      | p-values |
|-------------|--------|----------|
| D13 Vs. D21 | 0.3814 | 0.0526   |
| D13 Vs. D47 | 0.5495 | 0.051    |
| D21 Vs. D47 | 0.264  | 0.0131   |

R values varies from 0 to 1, where 0 indicates no difference between groups analyzed, whereas 1 indicates complete different between groups.  $P < 0.05$  indicates statistical significance.
