# Supplementary material
Source: MDPI journal article supplement (https://www.mdpi.com/2071-1050/15/1/501)
Supplement: s1 [file s1 › Table S3.pdf]

**Table S3.** Pairwise ANOSIM analysis of the chicken fecal microbiota comparing samples from different dietary treatments

| Comparison  | R       | p-values |
|-------------|---------|----------|
| CON Vs. OP3 | 0.03889 | 0.3168   |
| CON Vs. OP6 | 0.2397  | 0.05     |
| OP3 Vs. OP6 | -0.1296 | 0.914    |

R values vary from 0 to 1, where 0 indicates no difference between groups analyzed, whereas 1 indicates complete different between groups.  $P < 0.05$  indicates statistical significance.
