# Supplementary material
Source: MDPI journal article supplement (https://www.mdpi.com/2071-1050/15/1/501)
Supplement: s1 [file s1 › Table S4.xlsx]

## Sheet: Chicken_16S_DiffAbund_Species_T
Table S4. Differential abundance analyses of 41-day fecal samples, comparing OP3 to the untreated group CON.
OTUID	baseMean	log2FoldChange	lfcSE	pvalue	padj	CON_1	CON_2	CON_3	OP3_1	OP3_2	OP3_3	Kingdom	Phylum	Class	Order	Family	Genus	Species
JN392782.1.1395	37.3333	4.49269	2.10956	0.000603047	0.452889	1	1	2	25	194	1	D_0__Bacteria	D_1__Firmicutes	D_2__Bacilli	D_3__Bacillales	D_4__Staphylococcaceae	D_5__Staphylococcus	D_6__Staphylococcaceae bacterium b1_i1
GU113074.1.1458	108.333	3.47587	2.48716	0.00146207	0.475738	4	3	13	231	397	2	D_0__Bacteria	D_1__Firmicutes	D_2__Bacilli	D_3__Bacillales	D_4__Staphylococcaceae	D_5__Staphylococcus	D_6__Staphylococcus sp. P4
KC509575.1.1325	652.5	2.857	2.70994	0.00210572	0.475738	73	77	29	2441	1264	31	D_0__Bacteria	D_1__Firmicutes	D_2__Bacilli	D_3__Bacillales	D_4__Staphylococcaceae	D_5__Staphylococcus	D_6__halophilic bacterium JAS4
