# Supplementary material
Source: MDPI journal article supplement (https://www.mdpi.com/2071-1050/15/1/501)
Supplement: s1 [file s1 › Table S5.xlsx]

## Sheet: Chicken_16S_DiffAbund_Species_T
Table S5. Differential abundance analyses of 41-day fecal samples, comparing OP6 to the untreated group CON.
OTUID	baseMean	log2FoldChange	lfcSE	pvalue	padj	CON_1	CON_2	CON_3	OP6_1	OP6_2	OP6_3	Kingdom	Phylum	Class	Order	Family	Genus	Species
JX095969.1.1221	263.917	-5.45799	1.3905	2.26081e-06	0.0003346	10	1131	281	10	3	10	D_0__Bacteria	D_1__Firmicutes	D_2__Clostridia	D_3__Clostridiales	D_4__Peptostreptococcaceae	D_5__uncultured	D_6__uncultured bacterium
KC509575.1.1325	410.905	3.08353	0.990182	5.25139e-05	0.00388603	73	77	29	346	992	939	D_0__Bacteria	D_1__Firmicutes	D_2__Bacilli	D_3__Bacillales	D_4__Staphylococcaceae	D_5__Staphylococcus	D_6__halophilic bacterium JAS4
DQ057451.1.1404	172.578	3.62644	1.31367	0.000135799	0.00669943	21	12	14	106	824	57	D_0__Bacteria	D_1__Firmicutes	D_2__Bacilli	D_3__Lactobacillales	D_4__Lactobacillaceae	D_5__Lactobacillus	D_6__bacterium ii1270
KR078249.1.1212	111.68	2.96829	1.11456	0.000193565	0.00700091	14	17	18	82	302	235	D_0__Bacteria	D_1__Firmicutes	D_2__Bacilli	D_3__Bacillales	D_4__Staphylococcaceae	D_5__Staphylococcus	D_6__Staphylococcus sp. BW02
X84439.1.1511	116.725	3.38844	1.43429	0.000366938	0.00775813	22	11	1	314	41	310	D_0__Bacteria	D_1__Actinobacteria	D_2__Actinobacteria	D_3__Corynebacteriales	D_4__Corynebacteriaceae	D_5__Corynebacterium 1	D_6__Corynebacterium urealyticum
JX064851.1.1266	140.299	2.5909	1.25903	0.00076402	0.0141344	29	31	10	99	302	367	D_0__Bacteria	D_1__Firmicutes	D_2__Bacilli	D_3__Bacillales	D_4__Staphylococcaceae	D_5__Staphylococcus	D_6__Staphylococcaceae bacterium 5_Ne_8
KP114214.1.1424	31.9354	2.51724	1.34785	0.00117246	0.0189563	6	5	5	39	86	50	D_0__Bacteria	D_1__Actinobacteria	D_2__Actinobacteria	D_3__Corynebacteriales	D_4__Corynebacteriaceae	D_5__Corynebacterium 1	D_6__Corynebacterium variabile
AY255802.1.1568	28.2075	2.69804	1.49131	0.00128083	0.0189563	4	2	6	68	71	18	D_0__Bacteria	D_1__Firmicutes	D_2__Bacilli	D_3__Lactobacillales	D_4__Lactobacillaceae	D_5__Lactobacillus	D_6__Lactobacillus saerimneri
KU319425.1.1424	67.4354	1.84911	1.74298	0.00293796	0.0395289	22	5	19	64	157	137	D_0__Bacteria	D_1__Actinobacteria	D_2__Actinobacteria	D_3__Corynebacteriales	D_4__Corynebacteriaceae	D_5__Corynebacterium 1	D_6__Corynebacterium sp. C2-18
